# Supplementary material
Source: HighWire-hosted journal article supplement (https://erj.ersjournals.com/content/56/3/2000495)
Supplement: inline-supplementary-material-1 [file inline-supplementary-material-1.pdf]

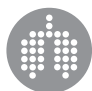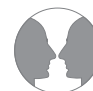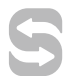

SHAREABLE PDF

# Ventilatory demand–capacity imbalance during incremental exercise in COPD: an *in silico* perspective

J. Alberto Neder 

**Affiliation:** Laboratory of Clinical Exercise Physiology, Division of Respiriology, Dept of Medicine, Kingston Health Science Center and Queen's University, Kingston, ON, Canada.

**Correspondence:** J. Alberto Neder, Laboratory of Clinical Exercise Physiology (LACEP), Kingston General Hospital, Connell 2-200, 76 Stuart St., K7L 2V7, Kingston, ON, Canada. E-mail: alberto.neder@queensu.ca

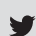

@ERSpublications

The  $V'_E$ – $V'_{CO_2}$  relationship during incremental exercise has a major impact on peak exercise capacity across the range of COPD severity. <https://bit.ly/2RU1fCy>

**Cite this article as:** Neder JA. Ventilatory demand–capacity imbalance during incremental exercise in COPD: an *in silico* perspective. *Eur Respir J* 2020; 56: 2000495 [<https://doi.org/10.1183/13993003.00495-2020>].

This single-page version can be shared freely online.

## To the Editor:

Exercise intolerance constitutes a key patient-oriented outcome in COPD [1]. There is mounting evidence that the so-called “ventilatory inefficiency” (as established by the linear minute ventilation ( $V'_E$ ) to carbon dioxide output ( $V'_{CO_2}$ ) relationship during incremental cardiopulmonary exercise testing (CPET)) [2] has an important role in setting the limits of exercise tolerance in this disease [3]. The rationale is straightforward: the faster  $V'_E$  increases (*i.e.* the steeper the  $V'_E$ – $V'_{CO_2}$  slope), and the higher its resting value ( $\sim$ y-intercept) [2], the sooner  $V'_E$  is expected to reach a lower compared to a higher maximum breathing capacity (MBC) [4]. Recognising that  $V'_E$  close to MBC cannot be sustained for a prolonged period of time without intolerable dyspnoea [5], it can be hypothesised that peak work rate (WR) would change inversely with  $V'_E$ – $V'_{CO_2}$  slope and intercept, but directly with MBC. Since the first two parameters are influenced by the fraction of  $V'_E$  “wasted” in the physiological dead space and the “set-point” for the arterial partial pressure for carbon dioxide [2], whereas MBC is linked to the resting ventilatory capacity [6], it is not surprising that the exertional ventilatory demand–capacity relationship varies markedly among patients with COPD [7].
